# Supplementary figures and images for: Cell Metabolomics Responses to Chlorpromazine: Novel Insights Into Blood Brain Barrier Dysfunctionality
Source: Research Square preprint supplement (doi:10.21203/rs.3.rs-776559/v1), 2021-08-10

**Supplementary Table 2.** Significantly altered metabolites in polar fraction.


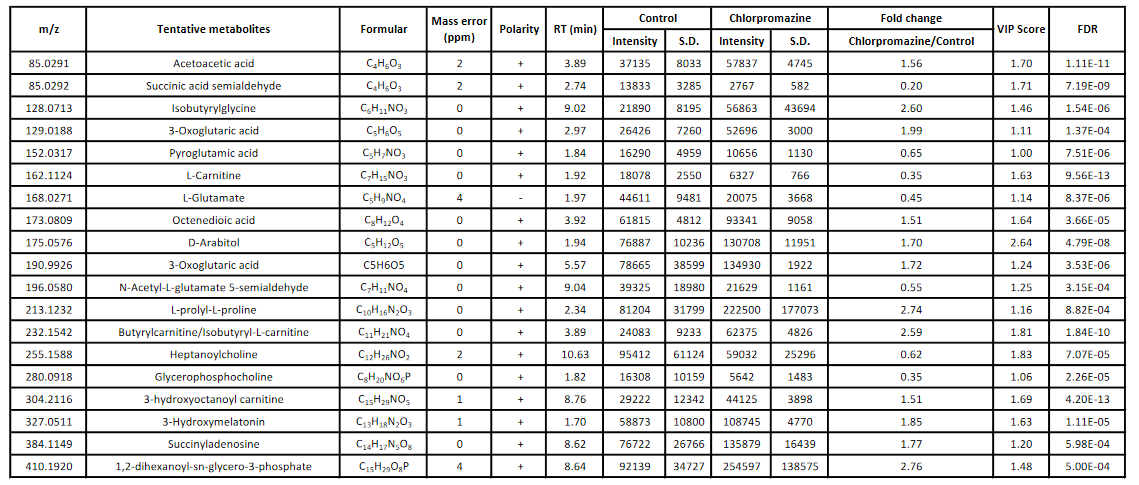

Supplement: Supplementary file 1 [file 70f587d77a11dc7d3260a424.docx]
